# Supplementary material for: Self-assembled metalla-bowls for selective sensing of multi-carboxylate anions
Source: Royal Society of Chemistry journal article supplement (doi:10.1039/c1dt11612f), 2011-11-25
Supplement: c1dt11612f.pdf [file c1dt11612f.pdf]

# Electronic Supporting Information

For the

Manuscript Entitled

## **Self-assembled metalla-bowls for selective sensing of multi-carboxylate anions**

*Anurag Mishra<sup>a</sup>, Vaishali Vajpayee<sup>a</sup>, Hyunuk Kim<sup>b</sup>, Min Hyung Lee,<sup>a</sup> Hyunji Jung<sup>a</sup>,  
Ming Wang<sup>c</sup>, Peter J. Stang<sup>c</sup> and Ki-Whan Chi<sup>a\*</sup>*

<sup>a</sup>Department of Chemistry, University of Ulsan, Ulsan 680-749, Republic of Korea

<sup>b</sup>Department of Chemistry, Pohang University of Science and Technology, San 31  
Hyojadong, Pohang 790-784, Republic of Korea

<sup>c</sup>Department of Chemistry, University of Utah, Salt Lake City, Utah 84112, U.S.A.

E-mail: kwchi@ulsan.ac.kr

## Table of Contents

|                                                                                              |      |
|----------------------------------------------------------------------------------------------|------|
| 1. <sup>1</sup> H spectra of ligand <b>1</b> , acceptor <b>2</b> and compound <b>4</b> ..... | 3    |
| 2. <sup>1</sup> H spectra of ligand <b>1</b> , acceptor <b>3</b> and compound <b>5</b> ..... | 4    |
| 3. Absorption spectra of <b>2</b> , <b>3</b> , <b>4</b> and <b>5</b> .....                   | 5    |
| 4. Emission spectra of <b>3</b> , <b>5</b> and <b>5</b> with oxalate.....                    | 5    |
| 5. Job's plot on titration with oxalate.....                                                 | 6    |
| 6. <sup>1</sup> H NMR titration data of <b>5</b> in presence of oxalate anion.....           | 6    |
| 7. Crystal data and structure refinement parameters of <b>4</b> .....                        | 7    |
| 8. Crystal structure (labeled) of metalla-bowl <b>4</b> .....                                | 8    |
| 9. Bond lengths [Å] and angles [°] for metalla-bowl <b>4</b> .....                           | 9-24 |

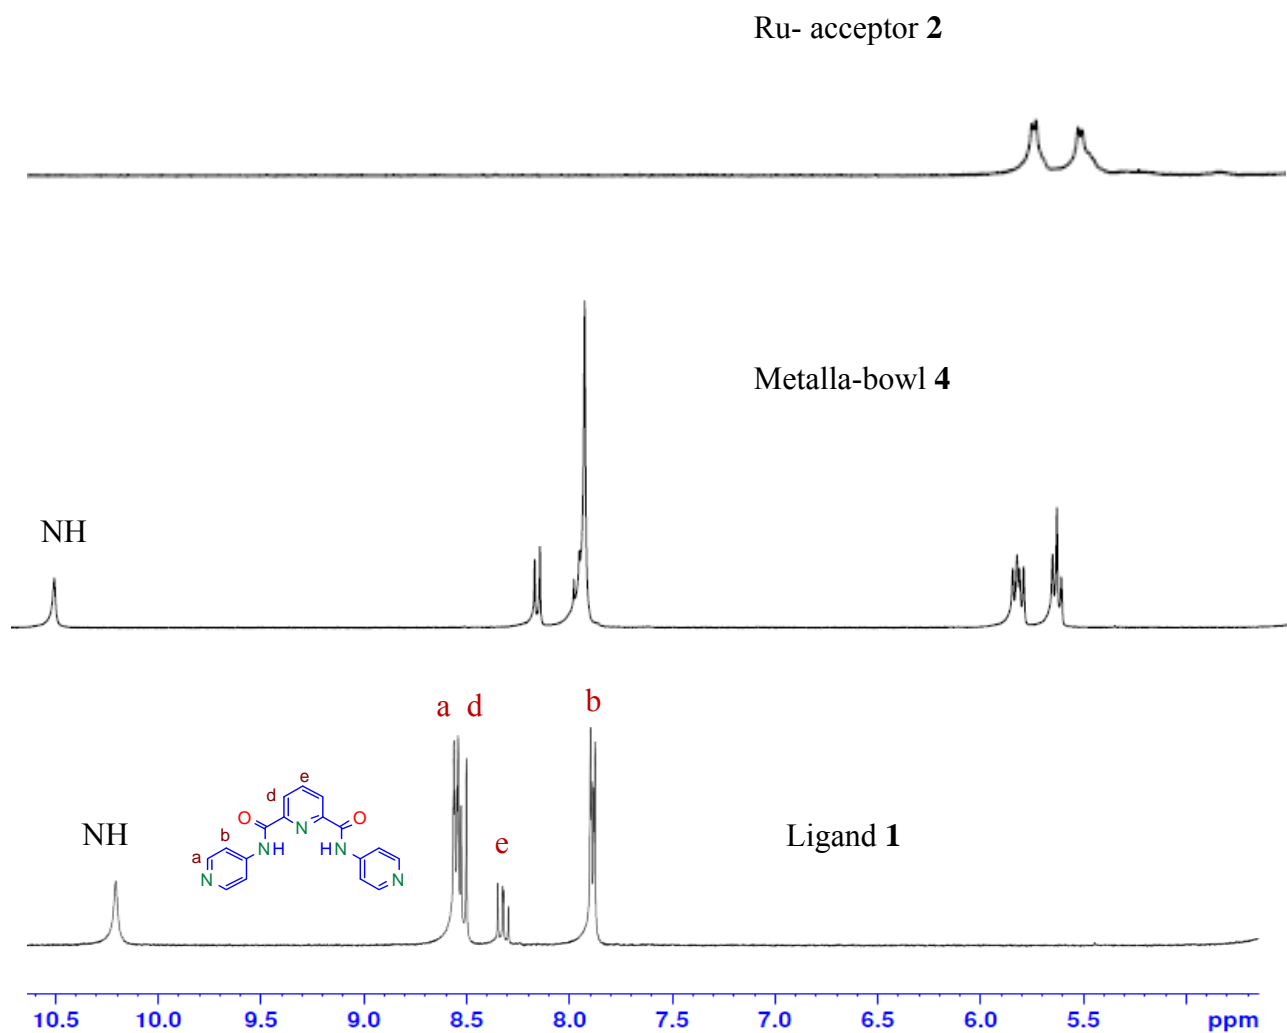

Fig. S1. Comparative NMR of metalla-bowl **4** with ligand **1** and Ru-acceptor **2** in nitromethane- $d_3$

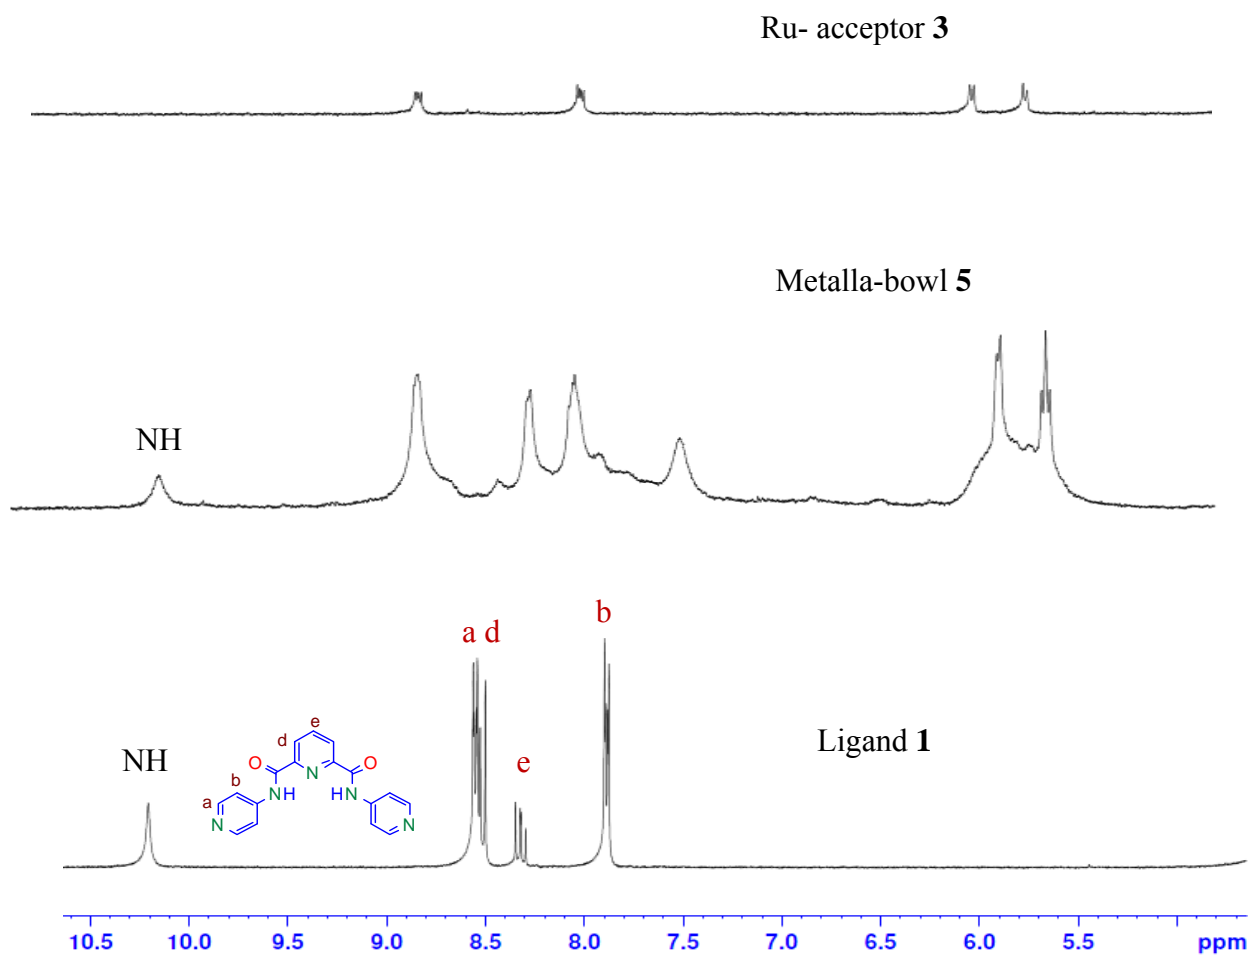

Fig. S2 Comparative NMR of metalla-bowl **5** with ligand **1** and Ru-acceptor **3** in nitromethane- $d_3$

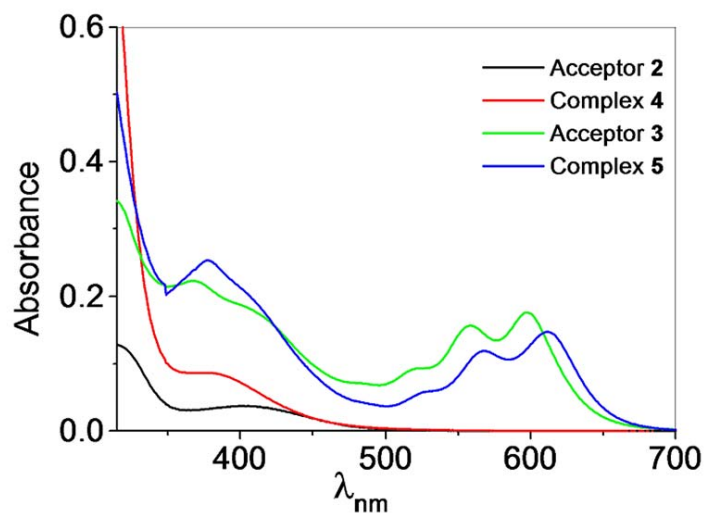

Fig. S3. Comparative absorption spectra of Ru acceptors **2**, **3** and metalla-bowls **4** and **5** in methanol.

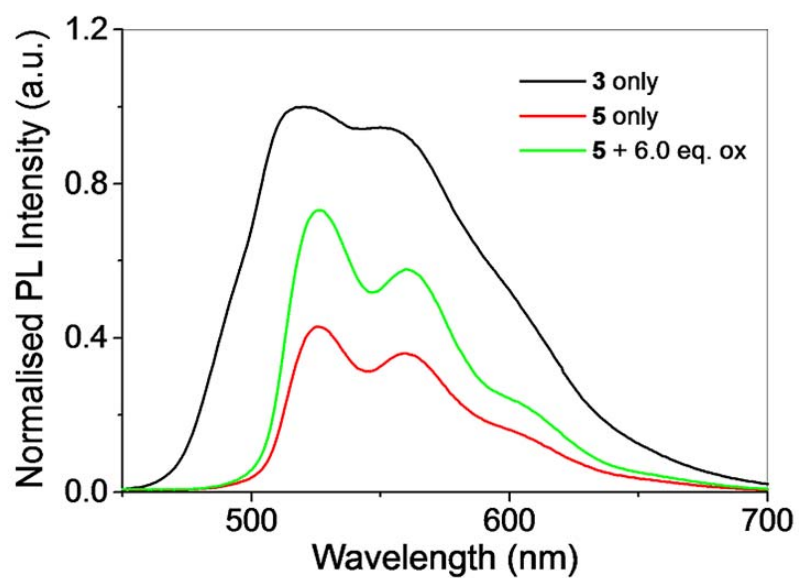

Fig. S4. Comparative emission spectra of Ru acceptor **3**, metalla-bowl **5** and after addition of 6.0 eq. of oxalate anion in **5** in methanol.

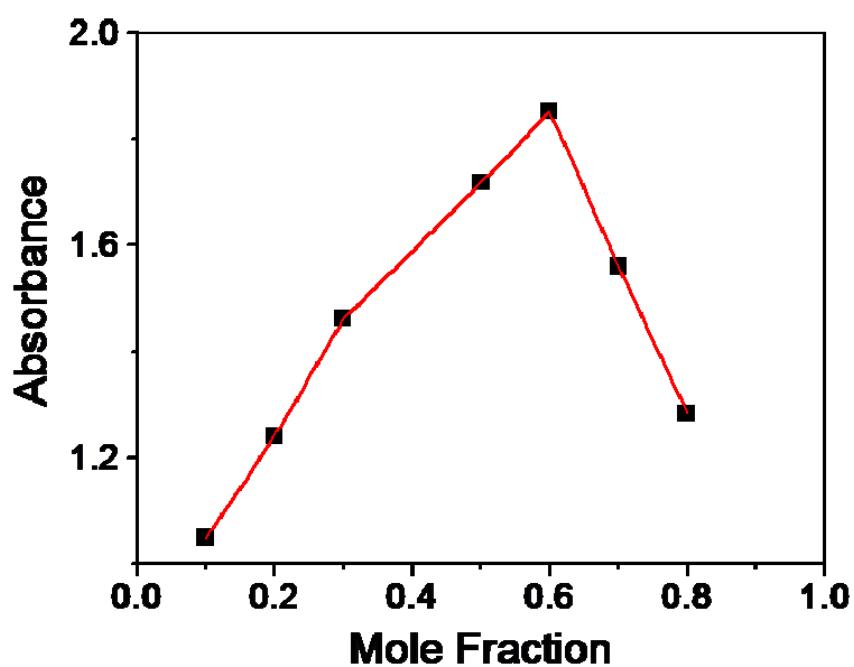

Fig. S5 Job's plot of oxalate anion titrations with **5** showing 1:1 fitting curve.

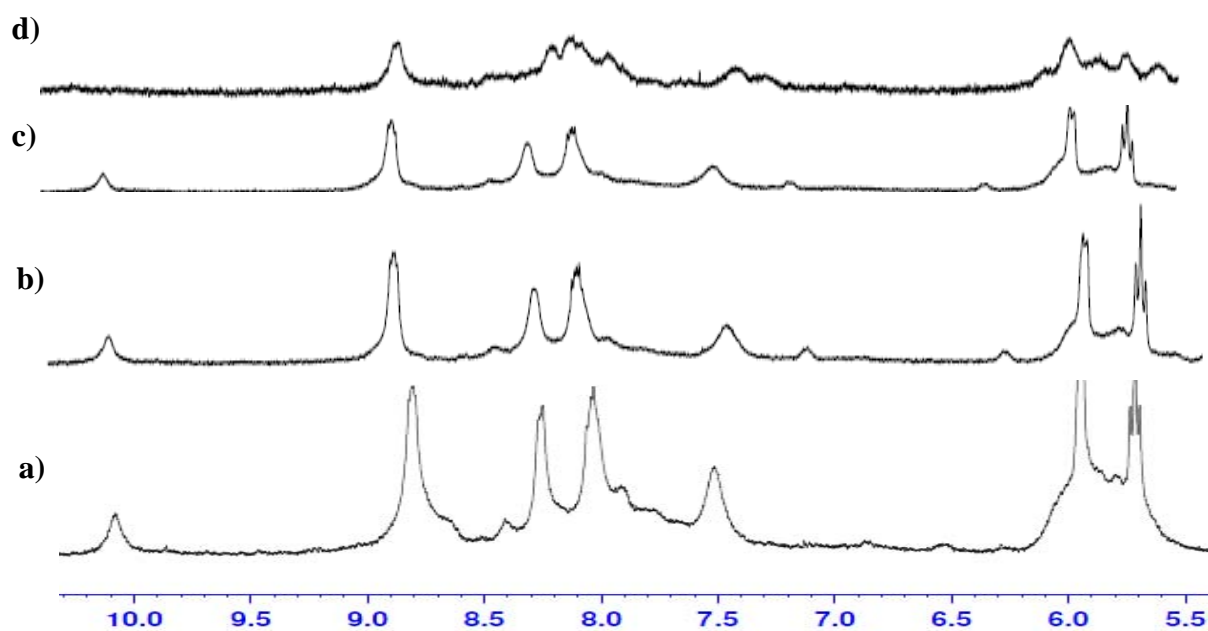

Fig. S6 <sup>1</sup>H NMR spectra of **5** in nitromethane-*d*<sub>3</sub> with increasing amounts of [Bu<sub>4</sub>N]<sub>2</sub> oxalate. (a) 0, (b) 0.5, (c) 1.0, and (d) 2.2 equiv of [Bu<sub>4</sub>N]<sub>2</sub> oxalate.

Table 1. Crystal data and structure refinement for **4**.

|                                              |                                                                 |                      |
|----------------------------------------------|-----------------------------------------------------------------|----------------------|
| Empirical formula                            | C165 H89.50 F12 N12.50 O24 Ru4 S4                               |                      |
| Formula weight                               | 3391.51                                                         |                      |
| Temperature                                  | 100(2) K                                                        |                      |
| Wavelength                                   | 1.00000 Å                                                       |                      |
| Crystal system                               | Triclinic                                                       |                      |
| Space group                                  | <i>P</i> -1                                                     |                      |
| Unit cell dimensions                         | <i>a</i> = 16.255(3) Å                                          | $\alpha$ = 78.93(3)° |
|                                              | <i>b</i> = 17.304(4) Å                                          | $\beta$ = 70.96(3)°  |
|                                              | <i>c</i> = 21.415(4) Å                                          | $\gamma$ = 74.07(3)° |
| Volume                                       | 5440.5(19) Å <sup>3</sup>                                       |                      |
| Z                                            | 2                                                               |                      |
| Density (calculated)                         | 2.070 g/cm <sup>3</sup>                                         |                      |
| Absorption coefficient                       | 1.849 mm <sup>-1</sup>                                          |                      |
| F(000)                                       | 3414                                                            |                      |
| Crystal size                                 | 0.20 × 0.05 × 0.04 mm <sup>3</sup>                              |                      |
| Theta range for data collection              | 1.92 to 30.07°                                                  |                      |
| Index ranges                                 | -15 ≤ <i>h</i> ≤ 15, -16 ≤ <i>k</i> ≤ 17, -20 ≤ <i>l</i> ≤ 19   |                      |
| Reflections collected                        | 13204                                                           |                      |
| Independent reflections                      | 7360 [R(int) = 0.0335]                                          |                      |
| Completeness to theta = 30.07°               | 64.1 %                                                          |                      |
| Max. and min. transmission                   | 0.9372 and 0.7347                                               |                      |
| Refinement method                            | Full-matrix least-squares on F <sup>2</sup>                     |                      |
| Data / restraints / parameters               | 7360 / 0 / 1154                                                 |                      |
| Goodness-of-fit on F <sup>2</sup>            | 1.865                                                           |                      |
| Final R indices [ <i>I</i> > 2σ( <i>I</i> )] | <i>R</i> <sub>1</sub> = 0.1365, <i>wR</i> <sub>2</sub> = 0.3840 |                      |
| R indices (all data)                         | <i>R</i> <sub>1</sub> = 0.1450, <i>wR</i> <sub>2</sub> = 0.3979 |                      |
| Extinction coefficient                       | 0.024(2)                                                        |                      |
| Largest diff. peak and hole                  | 1.350 and -0.658 e.Å <sup>-3</sup>                              |                      |
| Platon_squeeze_void_count_electrons          | 350                                                             |                      |

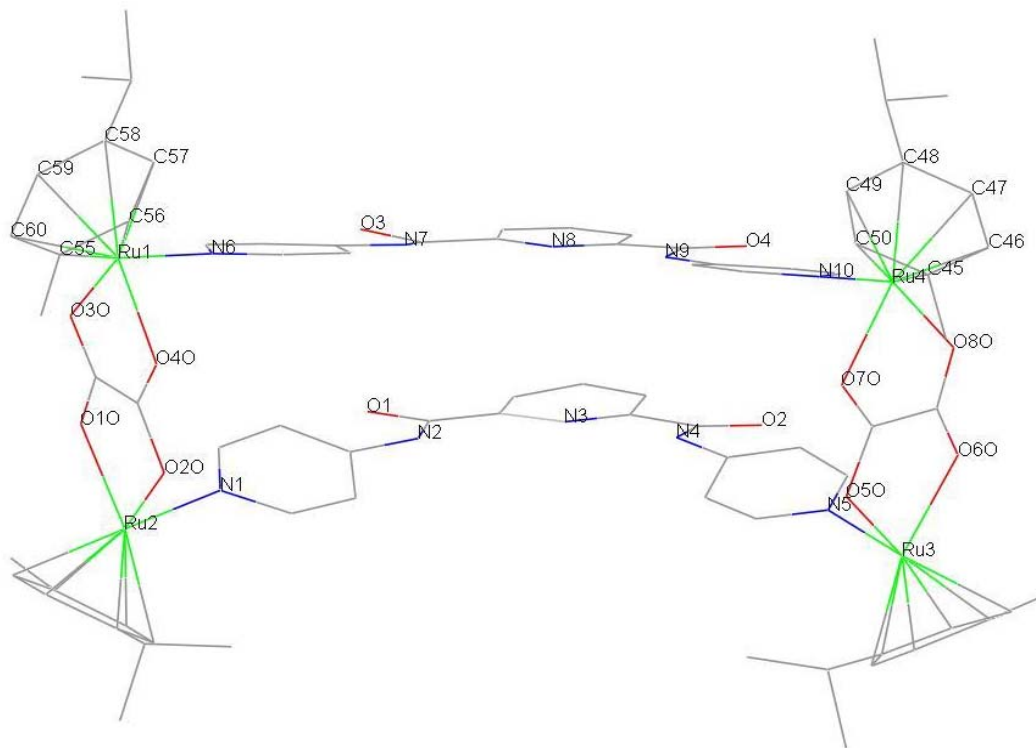

Fig. S7 Crystal structure (labeled) of metallabowl **4**.



Table 2. Bond lengths [ $\text{\AA}$ ] and angles [ $^\circ$ ] for metalla-bowl **4**.

---

|             |           |
|-------------|-----------|
| Ru(1)-N(6)  | 2.061(16) |
| Ru(1)-C(59) | 2.11(2)   |
| Ru(1)-O(3O) | 2.116(11) |
| Ru(1)-O(4O) | 2.124(11) |
| Ru(1)-C(60) | 2.16(3)   |
| Ru(1)-C(56) | 2.169(18) |
| Ru(1)-C(57) | 2.20(2)   |
| Ru(1)-C(58) | 2.20(2)   |
| Ru(1)-C(55) | 2.25(2)   |
| Ru(2)-N(1)  | 2.059(19) |
| Ru(2)-O(2O) | 2.080(12) |
| Ru(2)-O(1O) | 2.130(12) |
| Ru(2)-C(68) | 2.141(19) |
| Ru(2)-C(65) | 2.154(19) |
| Ru(2)-C(70) | 2.167(17) |
| Ru(2)-C(66) | 2.168(19) |
| Ru(2)-C(67) | 2.176(18) |
| Ru(2)-C(69) | 2.18(2)   |
| Ru(3)-O(5O) | 2.032(12) |
| Ru(3)-N(5)  | 2.093(17) |
| Ru(3)-O(6O) | 2.122(13) |
| Ru(3)-C(39) | 2.127(18) |
| Ru(3)-C(38) | 2.128(19) |
| Ru(3)-C(37) | 2.148(18) |
| Ru(3)-C(40) | 2.15(2)   |
| Ru(3)-C(35) | 2.164(19) |
| Ru(3)-C(36) | 2.24(2)   |
| Ru(4)-N(10) | 2.077(15) |
| Ru(4)-O(8O) | 2.118(13) |
| Ru(4)-O(7O) | 2.128(12) |
| Ru(4)-C(49) | 2.14(2)   |
| Ru(4)-C(50) | 2.157(17) |
| Ru(4)-C(46) | 2.16(2)   |
| Ru(4)-C(45) | 2.175(18) |

|             |         |
|-------------|---------|
| Ru(4)-C(47) | 2.18(2) |
| Ru(4)-C(48) | 2.23(2) |
| O(1)-C(6)   | 1.34(2) |
| O(2)-C(12)  | 1.21(3) |
| O(3)-C(23)  | 1.29(2) |
| O(4)-C(29)  | 1.23(3) |
| N(1)-C(2)   | 1.33(3) |
| N(1)-C(1)   | 1.38(3) |
| N(2)-C(6)   | 1.30(3) |
| N(2)-C(5)   | 1.42(3) |
| N(3)-C(11)  | 1.27(2) |
| N(3)-C(7)   | 1.42(3) |
| N(4)-C(13)  | 1.36(4) |
| N(4)-C(12)  | 1.40(3) |
| N(5)-C(17)  | 1.29(3) |
| N(5)-C(16)  | 1.31(3) |
| N(6)-C(18)  | 1.33(3) |
| N(6)-C(19)  | 1.33(2) |
| N(7)-C(23)  | 1.41(3) |
| N(7)-C(22)  | 1.43(3) |
| N(8)-C(28)  | 1.30(3) |
| N(8)-C(24)  | 1.32(3) |
| N(9)-C(29)  | 1.34(3) |
| N(9)-C(30)  | 1.45(3) |
| N(10)-C(33) | 1.30(2) |
| N(10)-C(34) | 1.35(3) |
| C(1)-C(3)   | 1.37(3) |
| C(2)-C(4)   | 1.39(3) |
| C(3)-C(5)   | 1.43(3) |
| C(4)-C(5)   | 1.38(3) |
| C(6)-C(7)   | 1.36(3) |
| C(7)-C(8)   | 1.45(3) |
| C(8)-C(9)   | 1.37(3) |
| C(9)-C(10)  | 1.44(3) |
| C(10)-C(11) | 1.41(3) |
| C(11)-C(12) | 1.48(3) |

|             |         |
|-------------|---------|
| C(13)-C(14) | 1.30(3) |
| C(13)-C(15) | 1.44(4) |
| C(14)-C(16) | 1.39(3) |
| C(15)-C(17) | 1.36(4) |
| C(18)-C(20) | 1.33(3) |
| C(19)-C(21) | 1.43(3) |
| C(20)-C(22) | 1.37(3) |
| C(21)-C(22) | 1.42(3) |
| C(23)-C(24) | 1.47(4) |
| C(24)-C(25) | 1.43(4) |
| C(25)-C(26) | 1.32(3) |
| C(26)-C(27) | 1.46(3) |
| C(27)-C(28) | 1.33(3) |
| C(28)-C(29) | 1.47(4) |
| C(30)-C(32) | 1.32(3) |
| C(30)-C(31) | 1.38(3) |
| C(31)-C(33) | 1.40(3) |
| C(32)-C(34) | 1.40(3) |
| C(35)-C(40) | 1.37(3) |
| C(35)-C(36) | 1.52(3) |
| C(36)-C(37) | 1.38(3) |
| C(37)-C(38) | 1.48(3) |
| C(37)-C(41) | 1.56(3) |
| C(38)-C(39) | 1.30(3) |
| C(39)-C(40) | 1.30(3) |
| C(40)-C(42) | 1.53(3) |
| C(42)-C(43) | 1.49(3) |
| C(42)-C(44) | 1.60(4) |
| C(45)-C(50) | 1.40(3) |
| C(45)-C(46) | 1.49(3) |
| C(45)-C(51) | 1.58(3) |
| C(46)-C(47) | 1.37(3) |
| C(47)-C(48) | 1.35(3) |
| C(48)-C(49) | 1.42(3) |
| C(48)-C(52) | 1.54(3) |
| C(49)-C(50) | 1.35(3) |

|             |           |
|-------------|-----------|
| C(52)-C(53) | 1.41(4)   |
| C(52)-C(54) | 1.57(3)   |
| C(55)-C(56) | 1.37(3)   |
| C(55)-C(60) | 1.42(4)   |
| C(55)-C(61) | 1.47(3)   |
| C(56)-C(57) | 1.51(3)   |
| C(57)-C(58) | 1.39(3)   |
| C(58)-C(59) | 1.35(3)   |
| C(58)-C(62) | 1.48(3)   |
| C(59)-C(60) | 1.54(3)   |
| C(62)-C(64) | 1.49(3)   |
| C(62)-C(63) | 1.67(4)   |
| C(65)-C(66) | 1.44(3)   |
| C(65)-C(70) | 1.47(3)   |
| C(65)-C(71) | 1.57(3)   |
| C(66)-C(67) | 1.27(3)   |
| C(67)-C(68) | 1.33(3)   |
| C(68)-C(69) | 1.41(3)   |
| C(68)-C(72) | 1.56(3)   |
| C(69)-C(70) | 1.43(3)   |
| C(72)-C(73) | 1.54(3)   |
| C(72)-C(74) | 1.54(3)   |
| C(10)-O(30) | 1.22(2)   |
| C(10)-O(10) | 1.31(3)   |
| C(10)-C(20) | 1.46(3)   |
| C(20)-O(40) | 1.19(2)   |
| C(20)-O(20) | 1.38(2)   |
| C(30)-O(80) | 1.17(2)   |
| C(30)-O(60) | 1.24(2)   |
| C(30)-C(40) | 1.46(3)   |
| C(40)-O(70) | 1.26(2)   |
| C(40)-O(50) | 1.38(2)   |
| S(1F)-O(2F) | 1.34(2)   |
| S(1F)-O(3F) | 1.501(18) |
| S(1F)-O(1F) | 1.557(19) |
| S(1F)-C(1F) | 2.14(8)   |

|             |           |
|-------------|-----------|
| F(1F)-C(1F) | 0.89(5)   |
| F(2F)-C(1F) | 1.39(4)   |
| F(3F)-C(1F) | 1.72(6)   |
| S(2F)-O(5F) | 1.364(14) |
| S(2F)-O(6F) | 1.470(14) |
| S(2F)-O(4F) | 1.56(2)   |
| S(2F)-C(2F) | 1.71(3)   |
| F(4F)-C(2F) | 1.33(3)   |
| F(5F)-C(2F) | 1.28(2)   |
| F(6F)-C(2F) | 1.43(3)   |
| S(3F)-O(7F) | 1.42(2)   |
| S(3F)-O(9F) | 1.435(17) |
| S(3F)-O(8F) | 1.433(17) |
| S(3F)-C(3F) | 1.81(3)   |
| F(7F)-C(3F) | 1.18(3)   |
| F(8F)-C(3F) | 1.46(4)   |
| F(9F)-C(3F) | 1.29(3)   |

|                   |           |
|-------------------|-----------|
| N(6)-Ru(1)-C(59)  | 121.8(10) |
| N(6)-Ru(1)-O(3O)  | 84.0(6)   |
| C(59)-Ru(1)-O(3O) | 96.6(9)   |
| N(6)-Ru(1)-O(4O)  | 83.2(5)   |
| C(59)-Ru(1)-O(4O) | 154.1(10) |
| O(3O)-Ru(1)-O(4O) | 78.1(6)   |
| N(6)-Ru(1)-C(60)  | 163.9(9)  |
| C(59)-Ru(1)-C(60) | 42.4(10)  |
| O(3O)-Ru(1)-C(60) | 94.1(10)  |
| O(4O)-Ru(1)-C(60) | 112.2(7)  |
| N(6)-Ru(1)-C(56)  | 118.1(9)  |
| C(59)-Ru(1)-C(56) | 79.4(8)   |
| O(3O)-Ru(1)-C(56) | 156.2(8)  |
| O(4O)-Ru(1)-C(56) | 95.3(7)   |
| C(60)-Ru(1)-C(56) | 67.0(10)  |
| N(6)-Ru(1)-C(57)  | 92.0(7)   |
| C(59)-Ru(1)-C(57) | 65.8(9)   |
| O(3O)-Ru(1)-C(57) | 156.4(7)  |

|                   |           |
|-------------------|-----------|
| O(4O)-Ru(1)-C(57) | 124.7(7)  |
| C(60)-Ru(1)-C(57) | 83.3(9)   |
| C(56)-Ru(1)-C(57) | 40.4(7)   |
| N(6)-Ru(1)-C(58)  | 94.4(9)   |
| C(59)-Ru(1)-C(58) | 36.5(9)   |
| O(3O)-Ru(1)-C(58) | 120.2(8)  |
| O(4O)-Ru(1)-C(58) | 161.4(9)  |
| C(60)-Ru(1)-C(58) | 72.6(10)  |
| C(56)-Ru(1)-C(58) | 69.5(8)   |
| C(57)-Ru(1)-C(58) | 36.8(8)   |
| N(6)-Ru(1)-C(55)  | 153.0(8)  |
| C(59)-Ru(1)-C(55) | 70.0(9)   |
| O(3O)-Ru(1)-C(55) | 120.5(7)  |
| O(4O)-Ru(1)-C(55) | 90.7(7)   |
| C(60)-Ru(1)-C(55) | 37.4(9)   |
| C(56)-Ru(1)-C(55) | 36.1(7)   |
| C(57)-Ru(1)-C(55) | 70.0(8)   |
| C(58)-Ru(1)-C(55) | 83.1(9)   |
| N(1)-Ru(2)-O(2O)  | 85.1(6)   |
| N(1)-Ru(2)-O(1O)  | 84.5(6)   |
| O(2O)-Ru(2)-O(1O) | 78.6(5)   |
| N(1)-Ru(2)-C(68)  | 125.4(10) |
| O(2O)-Ru(2)-C(68) | 93.3(7)   |
| O(1O)-Ru(2)-C(68) | 148.6(9)  |
| N(1)-Ru(2)-C(65)  | 112.0(8)  |
| O(2O)-Ru(2)-C(65) | 162.7(7)  |
| O(1O)-Ru(2)-C(65) | 99.6(9)   |
| C(68)-Ru(2)-C(65) | 79.3(9)   |
| N(1)-Ru(2)-C(70)  | 150.2(9)  |
| O(2O)-Ru(2)-C(70) | 123.0(7)  |
| O(1O)-Ru(2)-C(70) | 91.1(7)   |
| C(68)-Ru(2)-C(70) | 67.7(9)   |
| C(65)-Ru(2)-C(70) | 39.7(8)   |
| N(1)-Ru(2)-C(66)  | 91.5(7)   |
| O(2O)-Ru(2)-C(66) | 148.8(8)  |
| O(1O)-Ru(2)-C(66) | 132.0(8)  |

|                   |           |
|-------------------|-----------|
| C(68)-Ru(2)-C(66) | 63.7(9)   |
| C(65)-Ru(2)-C(66) | 38.9(8)   |
| C(70)-Ru(2)-C(66) | 69.8(8)   |
| N(1)-Ru(2)-C(67)  | 97.5(8)   |
| O(2O)-Ru(2)-C(67) | 115.7(7)  |
| O(1O)-Ru(2)-C(67) | 165.6(7)  |
| C(68)-Ru(2)-C(67) | 36.0(8)   |
| C(65)-Ru(2)-C(67) | 66.5(9)   |
| C(70)-Ru(2)-C(67) | 80.0(8)   |
| C(66)-Ru(2)-C(67) | 34.0(7)   |
| N(1)-Ru(2)-C(69)  | 163.6(9)  |
| O(2O)-Ru(2)-C(69) | 94.4(6)   |
| O(1O)-Ru(2)-C(69) | 111.5(7)  |
| C(68)-Ru(2)-C(69) | 38.2(8)   |
| C(65)-Ru(2)-C(69) | 70.1(8)   |
| C(70)-Ru(2)-C(69) | 38.3(8)   |
| C(66)-Ru(2)-C(69) | 80.5(7)   |
| C(67)-Ru(2)-C(69) | 67.9(8)   |
| O(5O)-Ru(3)-N(5)  | 86.3(6)   |
| O(5O)-Ru(3)-O(6O) | 78.9(5)   |
| N(5)-Ru(3)-O(6O)  | 83.0(6)   |
| O(5O)-Ru(3)-C(39) | 117.1(8)  |
| N(5)-Ru(3)-C(39)  | 99.9(8)   |
| O(6O)-Ru(3)-C(39) | 163.7(8)  |
| O(5O)-Ru(3)-C(38) | 151.5(8)  |
| N(5)-Ru(3)-C(38)  | 91.2(7)   |
| O(6O)-Ru(3)-C(38) | 129.0(8)  |
| C(39)-Ru(3)-C(38) | 35.5(8)   |
| O(5O)-Ru(3)-C(37) | 159.3(8)  |
| N(5)-Ru(3)-C(37)  | 113.2(9)  |
| O(6O)-Ru(3)-C(37) | 96.4(7)   |
| C(39)-Ru(3)-C(37) | 67.7(8)   |
| C(38)-Ru(3)-C(37) | 40.6(8)   |
| O(5O)-Ru(3)-C(40) | 92.0(7)   |
| N(5)-Ru(3)-C(40)  | 125.2(10) |
| O(6O)-Ru(3)-C(40) | 150.1(9)  |

|                   |           |
|-------------------|-----------|
| C(39)-Ru(3)-C(40) | 35.2(8)   |
| C(38)-Ru(3)-C(40) | 66.4(8)   |
| C(37)-Ru(3)-C(40) | 82.1(8)   |
| O(5O)-Ru(3)-C(35) | 94.2(7)   |
| N(5)-Ru(3)-C(35)  | 162.3(11) |
| O(6O)-Ru(3)-C(35) | 114.5(9)  |
| C(39)-Ru(3)-C(35) | 64.1(9)   |
| C(38)-Ru(3)-C(35) | 79.9(8)   |
| C(37)-Ru(3)-C(35) | 69.3(9)   |
| C(40)-Ru(3)-C(35) | 37.1(8)   |
| O(5O)-Ru(3)-C(36) | 122.9(7)  |
| N(5)-Ru(3)-C(36)  | 148.5(8)  |
| O(6O)-Ru(3)-C(36) | 91.1(7)   |
| C(39)-Ru(3)-C(36) | 78.0(9)   |
| C(38)-Ru(3)-C(36) | 68.7(8)   |
| C(37)-Ru(3)-C(36) | 36.6(8)   |
| C(40)-Ru(3)-C(36) | 69.9(8)   |
| C(35)-Ru(3)-C(36) | 40.2(9)   |
| N(10)-Ru(4)-O(8O) | 81.4(6)   |
| N(10)-Ru(4)-O(7O) | 82.0(6)   |
| O(8O)-Ru(4)-O(7O) | 76.4(6)   |
| N(10)-Ru(4)-C(49) | 95.7(8)   |
| O(8O)-Ru(4)-C(49) | 163.2(8)  |
| O(7O)-Ru(4)-C(49) | 119.7(7)  |
| N(10)-Ru(4)-C(50) | 119.6(8)  |
| O(8O)-Ru(4)-C(50) | 155.9(8)  |
| O(7O)-Ru(4)-C(50) | 93.9(8)   |
| C(49)-Ru(4)-C(50) | 36.5(7)   |
| N(10)-Ru(4)-C(46) | 154.5(9)  |
| O(8O)-Ru(4)-C(46) | 96.5(7)   |
| O(7O)-Ru(4)-C(46) | 122.5(8)  |
| C(49)-Ru(4)-C(46) | 78.8(9)   |
| C(50)-Ru(4)-C(46) | 69.8(7)   |
| N(10)-Ru(4)-C(45) | 157.1(11) |
| O(8O)-Ru(4)-C(45) | 119.8(9)  |
| O(7O)-Ru(4)-C(45) | 94.1(7)   |



|                   |           |
|-------------------|-----------|
| C(49)-Ru(4)-C(45) | 66.5(10)  |
| C(50)-Ru(4)-C(45) | 37.8(8)   |
| C(46)-Ru(4)-C(45) | 40.3(9)   |
| N(10)-Ru(4)-C(47) | 118.2(9)  |
| O(8O)-Ru(4)-C(47) | 100.9(8)  |
| O(7O)-Ru(4)-C(47) | 159.3(9)  |
| C(49)-Ru(4)-C(47) | 65.8(8)   |
| C(50)-Ru(4)-C(47) | 80.3(8)   |
| C(46)-Ru(4)-C(47) | 36.9(9)   |
| C(45)-Ru(4)-C(47) | 69.1(9)   |
| N(10)-Ru(4)-C(48) | 94.0(8)   |
| O(8O)-Ru(4)-C(48) | 125.6(8)  |
| O(7O)-Ru(4)-C(48) | 157.0(8)  |
| C(49)-Ru(4)-C(48) | 37.8(8)   |
| C(50)-Ru(4)-C(48) | 68.3(9)   |
| C(46)-Ru(4)-C(48) | 66.4(10)  |
| C(45)-Ru(4)-C(48) | 80.7(9)   |
| C(47)-Ru(4)-C(48) | 35.7(9)   |
| C(2)-N(1)-C(1)    | 114.4(17) |
| C(2)-N(1)-Ru(2)   | 123.7(16) |
| C(1)-N(1)-Ru(2)   | 121.5(14) |
| C(6)-N(2)-C(5)    | 131(2)    |
| C(11)-N(3)-C(7)   | 120(2)    |
| C(13)-N(4)-C(12)  | 122(2)    |
| C(17)-N(5)-C(16)  | 110.5(18) |
| C(17)-N(5)-Ru(3)  | 122.9(17) |
| C(16)-N(5)-Ru(3)  | 126.3(18) |
| C(18)-N(6)-C(19)  | 115.0(17) |
| C(18)-N(6)-Ru(1)  | 120.8(18) |
| C(19)-N(6)-Ru(1)  | 124.0(13) |
| C(23)-N(7)-C(22)  | 130.5(19) |
| C(28)-N(8)-C(24)  | 109(2)    |
| C(29)-N(9)-C(30)  | 130(2)    |
| C(33)-N(10)-C(34) | 114.7(16) |
| C(33)-N(10)-Ru(4) | 124.0(15) |
| C(34)-N(10)-Ru(4) | 121.1(13) |

|                   |           |
|-------------------|-----------|
| C(3)-C(1)-N(1)    | 124(2)    |
| N(1)-C(2)-C(4)    | 127(2)    |
| C(1)-C(3)-C(5)    | 119(3)    |
| C(5)-C(4)-C(2)    | 118(2)    |
| C(4)-C(5)-N(2)    | 125(3)    |
| C(4)-C(5)-C(3)    | 118(2)    |
| N(2)-C(5)-C(3)    | 117(3)    |
| N(2)-C(6)-O(1)    | 117(2)    |
| N(2)-C(6)-C(7)    | 122(2)    |
| O(1)-C(6)-C(7)    | 121(2)    |
| C(6)-C(7)-N(3)    | 121(2)    |
| C(6)-C(7)-C(8)    | 123(2)    |
| N(3)-C(7)-C(8)    | 116(2)    |
| C(9)-C(8)-C(7)    | 125(2)    |
| C(8)-C(9)-C(10)   | 115(2)    |
| C(11)-C(10)-C(9)  | 118(2)    |
| N(3)-C(11)-C(10)  | 127(2)    |
| N(3)-C(11)-C(12)  | 119(2)    |
| C(10)-C(11)-C(12) | 115(2)    |
| O(2)-C(12)-N(4)   | 124(2)    |
| O(2)-C(12)-C(11)  | 125(2)    |
| N(4)-C(12)-C(11)  | 111(2)    |
| C(14)-C(13)-N(4)  | 127(2)    |
| C(14)-C(13)-C(15) | 111(3)    |
| N(4)-C(13)-C(15)  | 121(3)    |
| C(13)-C(14)-C(16) | 122(3)    |
| C(17)-C(15)-C(13) | 121(3)    |
| N(5)-C(16)-C(14)  | 128(2)    |
| N(5)-C(17)-C(15)  | 127(2)    |
| N(6)-C(18)-C(20)  | 125(2)    |
| N(6)-C(19)-C(21)  | 127.5(17) |
| C(18)-C(20)-C(22) | 119(2)    |
| C(22)-C(21)-C(19) | 111(2)    |
| C(20)-C(22)-C(21) | 122(2)    |
| C(20)-C(22)-N(7)  | 130(2)    |
| C(21)-C(22)-N(7)  | 107(3)    |

|                   |           |
|-------------------|-----------|
| O(3)-C(23)-N(7)   | 110(3)    |
| O(3)-C(23)-C(24)  | 123(3)    |
| N(7)-C(23)-C(24)  | 126.0(19) |
| N(8)-C(24)-C(25)  | 128(3)    |
| N(8)-C(24)-C(23)  | 113(3)    |
| C(25)-C(24)-C(23) | 118(3)    |
| C(26)-C(25)-C(24) | 119(3)    |
| C(25)-C(26)-C(27) | 114(2)    |
| C(28)-C(27)-C(26) | 119(2)    |
| N(8)-C(28)-C(27)  | 131(3)    |
| N(8)-C(28)-C(29)  | 113(2)    |
| C(27)-C(28)-C(29) | 116(3)    |
| O(4)-C(29)-N(9)   | 124(3)    |
| O(4)-C(29)-C(28)  | 121(2)    |
| N(9)-C(29)-C(28)  | 115(3)    |
| C(32)-C(30)-C(31) | 117(3)    |
| C(32)-C(30)-N(9)  | 125(2)    |
| C(31)-C(30)-N(9)  | 119(2)    |
| C(30)-C(31)-C(33) | 120(2)    |
| C(30)-C(32)-C(34) | 121(2)    |
| N(10)-C(33)-C(31) | 125(2)    |
| N(10)-C(34)-C(32) | 123.6(17) |
| C(40)-C(35)-C(36) | 121.1(18) |
| C(40)-C(35)-Ru(3) | 71.0(12)  |
| C(36)-C(35)-Ru(3) | 72.5(11)  |
| C(37)-C(36)-C(35) | 116(2)    |
| C(37)-C(36)-Ru(3) | 68.2(12)  |
| C(35)-C(36)-Ru(3) | 67.2(12)  |
| C(36)-C(37)-C(38) | 118.8(18) |
| C(36)-C(37)-C(41) | 119(2)    |
| C(38)-C(37)-C(41) | 122(2)    |
| C(36)-C(37)-Ru(3) | 75.3(12)  |
| C(38)-C(37)-Ru(3) | 69.0(11)  |
| C(41)-C(37)-Ru(3) | 126.9(12) |
| C(39)-C(38)-C(37) | 117.5(18) |
| C(39)-C(38)-Ru(3) | 72.2(13)  |

|                   |           |
|-------------------|-----------|
| C(37)-C(38)-Ru(3) | 70.4(10)  |
| C(40)-C(39)-C(38) | 129(2)    |
| C(40)-C(39)-Ru(3) | 73.5(12)  |
| C(38)-C(39)-Ru(3) | 72.3(12)  |
| C(39)-C(40)-C(35) | 117(2)    |
| C(39)-C(40)-C(42) | 128(3)    |
| C(35)-C(40)-C(42) | 115(3)    |
| C(39)-C(40)-Ru(3) | 71.3(12)  |
| C(35)-C(40)-Ru(3) | 71.9(12)  |
| C(42)-C(40)-Ru(3) | 129.6(16) |
| C(43)-C(42)-C(40) | 113(2)    |
| C(43)-C(42)-C(44) | 115(3)    |
| C(40)-C(42)-C(44) | 107(2)    |
| C(50)-C(45)-C(46) | 117(2)    |
| C(50)-C(45)-C(51) | 124(3)    |
| C(46)-C(45)-C(51) | 119(3)    |
| C(50)-C(45)-Ru(4) | 70.4(11)  |
| C(46)-C(45)-Ru(4) | 69.3(12)  |
| C(51)-C(45)-Ru(4) | 126.8(13) |
| C(47)-C(46)-C(45) | 119(2)    |
| C(47)-C(46)-Ru(4) | 72.5(15)  |
| C(45)-C(46)-Ru(4) | 70.5(12)  |
| C(48)-C(47)-C(46) | 123(2)    |
| C(48)-C(47)-Ru(4) | 74.1(16)  |
| C(46)-C(47)-Ru(4) | 70.6(13)  |
| C(47)-C(48)-C(49) | 116(2)    |
| C(47)-C(48)-C(52) | 123(2)    |
| C(49)-C(48)-C(52) | 121(2)    |
| C(47)-C(48)-Ru(4) | 70.2(12)  |
| C(49)-C(48)-Ru(4) | 67.6(12)  |
| C(52)-C(48)-Ru(4) | 132.3(18) |
| C(50)-C(49)-C(48) | 126(2)    |
| C(50)-C(49)-Ru(4) | 72.5(12)  |
| C(48)-C(49)-Ru(4) | 74.6(11)  |
| C(49)-C(50)-C(45) | 119(2)    |
| C(49)-C(50)-Ru(4) | 71.0(11)  |

|                   |           |
|-------------------|-----------|
| C(45)-C(50)-Ru(4) | 71.8(10)  |
| C(53)-C(52)-C(48) | 107(2)    |
| C(53)-C(52)-C(54) | 116(2)    |
| C(48)-C(52)-C(54) | 111(2)    |
| C(56)-C(55)-C(60) | 118(2)    |
| C(56)-C(55)-C(61) | 122(2)    |
| C(60)-C(55)-C(61) | 119(2)    |
| C(56)-C(55)-Ru(1) | 68.7(12)  |
| C(60)-C(55)-Ru(1) | 67.7(13)  |
| C(61)-C(55)-Ru(1) | 127.5(14) |
| C(55)-C(56)-C(57) | 125(2)    |
| C(55)-C(56)-Ru(1) | 75.3(12)  |
| C(57)-C(56)-Ru(1) | 70.8(11)  |
| C(58)-C(57)-C(56) | 118(2)    |
| C(58)-C(57)-Ru(1) | 71.6(13)  |
| C(56)-C(57)-Ru(1) | 68.7(10)  |
| C(59)-C(58)-C(57) | 117(2)    |
| C(59)-C(58)-C(62) | 126(2)    |
| C(57)-C(58)-C(62) | 116(3)    |
| C(59)-C(58)-Ru(1) | 68.0(13)  |
| C(57)-C(58)-Ru(1) | 71.6(12)  |
| C(62)-C(58)-Ru(1) | 133.0(16) |
| C(58)-C(59)-C(60) | 126(2)    |
| C(58)-C(59)-Ru(1) | 75.4(15)  |
| C(60)-C(59)-Ru(1) | 70.6(13)  |
| C(55)-C(60)-C(59) | 115(3)    |
| C(55)-C(60)-Ru(1) | 74.9(18)  |
| C(59)-C(60)-Ru(1) | 67.0(12)  |
| C(58)-C(62)-C(64) | 111.6(19) |
| C(58)-C(62)-C(63) | 111(2)    |
| C(64)-C(62)-C(63) | 109(2)    |
| C(66)-C(65)-C(70) | 117(2)    |
| C(66)-C(65)-C(71) | 133(2)    |
| C(70)-C(65)-C(71) | 109(3)    |
| C(66)-C(65)-Ru(2) | 71.1(12)  |
| C(70)-C(65)-Ru(2) | 70.6(10)  |

|                   |           |
|-------------------|-----------|
| C(71)-C(65)-Ru(2) | 124.7(15) |
| C(67)-C(66)-C(65) | 122(2)    |
| C(67)-C(66)-Ru(2) | 73.3(12)  |
| C(65)-C(66)-Ru(2) | 70.0(11)  |
| C(66)-C(67)-C(68) | 122(2)    |
| C(66)-C(67)-Ru(2) | 72.6(12)  |
| C(68)-C(67)-Ru(2) | 70.6(11)  |
| C(67)-C(68)-C(69) | 125(2)    |
| C(67)-C(68)-C(72) | 127(3)    |
| C(69)-C(68)-C(72) | 108(2)    |
| C(67)-C(68)-Ru(2) | 73.5(12)  |
| C(69)-C(68)-Ru(2) | 72.5(11)  |
| C(72)-C(68)-Ru(2) | 126.9(15) |
| C(68)-C(69)-C(70) | 115.4(19) |
| C(68)-C(69)-Ru(2) | 69.3(12)  |
| C(70)-C(69)-Ru(2) | 70.3(11)  |
| C(69)-C(70)-C(65) | 119(2)    |
| C(69)-C(70)-Ru(2) | 71.4(12)  |
| C(65)-C(70)-Ru(2) | 69.7(11)  |
| C(73)-C(72)-C(74) | 104.5(19) |
| C(73)-C(72)-C(68) | 109.3(19) |
| C(74)-C(72)-C(68) | 107.3(19) |
| O(30)-C(10)-O(10) | 124.9(18) |
| O(30)-C(10)-C(20) | 117(2)    |
| O(10)-C(10)-C(20) | 117(2)    |
| O(40)-C(20)-O(20) | 121(2)    |
| O(40)-C(20)-C(10) | 122(2)    |
| O(20)-C(20)-C(10) | 115.7(19) |
| O(80)-C(30)-O(60) | 130.3(19) |
| O(80)-C(30)-C(40) | 112(2)    |
| O(60)-C(30)-C(40) | 117(2)    |
| O(70)-C(40)-O(50) | 118(2)    |
| O(70)-C(40)-C(30) | 125(2)    |
| O(50)-C(40)-C(30) | 116.3(18) |
| C(10)-O(10)-Ru(2) | 114.2(12) |
| C(20)-O(20)-Ru(2) | 113.7(13) |

|                   |           |
|-------------------|-----------|
| C(1O)-O(3O)-Ru(1) | 110.9(14) |
| C(2O)-O(4O)-Ru(1) | 109.9(15) |
| C(4O)-O(5O)-Ru(3) | 112.7(13) |
| C(3O)-O(6O)-Ru(3) | 114.7(13) |
| C(4O)-O(7O)-Ru(4) | 107.4(14) |
| C(3O)-O(8O)-Ru(4) | 118.6(14) |
| O(2F)-S(1F)-O(3F) | 119.3(12) |
| O(2F)-S(1F)-O(1F) | 109.8(13) |
| O(3F)-S(1F)-O(1F) | 115.4(11) |
| O(2F)-S(1F)-C(1F) | 104.1(14) |
| O(3F)-S(1F)-C(1F) | 115.9(13) |
| O(1F)-S(1F)-C(1F) | 87.5(19)  |
| F(1F)-C(1F)-F(2F) | 155(7)    |
| F(1F)-C(1F)-F(3F) | 112(5)    |
| F(2F)-C(1F)-F(3F) | 83(2)     |
| F(1F)-C(1F)-S(1F) | 110(4)    |
| F(2F)-C(1F)-S(1F) | 91(4)     |
| F(3F)-C(1F)-S(1F) | 85(3)     |
| O(5F)-S(2F)-O(6F) | 116.5(9)  |
| O(5F)-S(2F)-O(4F) | 115.8(10) |
| O(6F)-S(2F)-O(4F) | 111.2(8)  |
| O(5F)-S(2F)-C(2F) | 106.9(12) |
| O(6F)-S(2F)-C(2F) | 104.6(12) |
| O(4F)-S(2F)-C(2F) | 99.5(14)  |
| F(5F)-C(2F)-F(4F) | 106(2)    |
| F(5F)-C(2F)-F(6F) | 106(2)    |
| F(4F)-C(2F)-F(6F) | 107(2)    |
| F(5F)-C(2F)-S(2F) | 113(2)    |
| F(4F)-C(2F)-S(2F) | 118(2)    |
| F(6F)-C(2F)-S(2F) | 106.9(19) |
| O(7F)-S(3F)-O(9F) | 113.1(11) |
| O(7F)-S(3F)-O(8F) | 109.2(14) |
| O(9F)-S(3F)-O(8F) | 119.5(13) |
| O(7F)-S(3F)-C(3F) | 96.1(16)  |
| O(9F)-S(3F)-C(3F) | 107.0(12) |
| O(8F)-S(3F)-C(3F) | 109.3(15) |

|                   |           |
|-------------------|-----------|
| F(7F)-C(3F)-F(9F) | 115(3)    |
| F(7F)-C(3F)-F(8F) | 103(2)    |
| F(9F)-C(3F)-F(8F) | 94(3)     |
| F(7F)-C(3F)-S(3F) | 119(2)    |
| F(9F)-C(3F)-S(3F) | 116.4(18) |
| F(8F)-C(3F)-S(3F) | 103(2)    |

---

Symmetry transformations used to generate equivalent atoms:
